# Supplementary material for: Innovative Green Approach for Extraction of Piperine from Black Pepper Based on Response Surface Methodology
Source: MDPI journal article supplement (doi:10.3390/suschem4010005), 2023-01-24
Supplement: s1 [file s1]

Supplementary materials

**Table S1.** ANOVA results for the established model of piperine.

| Source                    | Response (piperine) |                 |
|---------------------------|---------------------|-----------------|
| <i>P value</i> (prob > F) |                     |                 |
| <b>Model</b>              | 0.0016              | significant     |
| A-Duration                | 0.0038              |                 |
| B-Temperature             | 0.1189              |                 |
| C-Water                   | 0.2483              |                 |
| D-Liquid/solid ratio      | < 0.0001            |                 |
| AB                        | 0.2250              |                 |
| AC                        | 0.8533              |                 |
| AD                        | 0.0787              |                 |
| BC                        | 0.9737              |                 |
| BD                        | 0.9100              |                 |
| CD                        | 0.7556              |                 |
| A <sup>2</sup>            | 0.7052              |                 |
| B <sup>2</sup>            | 0.3700              |                 |
| C <sup>2</sup>            | 0.4389              |                 |
| D <sup>2</sup>            | 0.7319              |                 |
| Lack of Fit               | 0.3736              | not significant |
| R <sup>2</sup>            | 0.8284              |                 |
